# Supplementary material for: A cautionary note on the use of Ornstein Uhlenbeck models in macroevolutionary studies
Source: PubMed Central journal article supplement (PMC4949538; doi:10.1111/bij.12701), 2015-12-01
Supplement: BIJ-118-64-s001.pdf [file BIJ-118-64-s001.pdf]

# Supporting Information

## Literature review methods

To get an overview of the use of OU models in ecology, evolution and palaeontology, we used Google Scholar (accessed 13th March 2015) to locate papers published  
5 between 2005 (when the R package *ouch* was released; Butler and King 2004) and  
2014 that contained the terms “Ornstein Uhlenbeck” and either “ecology”, or  
“evolution” and “biology” (the “biology” term was added to omit physics papers  
which also use the term “evolution”), or “paleo/palaeo”. We also recorded the total  
number of papers containing the terms “ecology”, or “evolution” and “biology”, or  
10 “paleo/palaeo”, published between 2005 and 2014 and plotted the number of OU  
papers published each year as a proportion of the total number of papers published  
(Fig. 1 in the main text).

Next we filtered our Google Scholar search results to focus on empirical papers  
using OU models (rather than pure methods papers) published in the following  
15 journals: *The American Naturalist*, *Ecology Letters*, *Evolution*, *Journal of*  
*Evolutionary Biology*, *Nature*, *Proceedings of the National Academy of Sciences*,  
USA, *Proceedings of the Royal Society B: Biological Sciences*, and *Science*. We only  
include papers up to the end of 2013 to ensure completeness.

For each of these papers we recorded the number of species in the analysis, the  
20 study group (amphibians, birds, fish, mammals, reptiles, invertebrates or plants), the  
statistical package or specific R package used to fit the models, and the reason the  
authors state for using an OU model (ancestral state reconstructions, detecting  
convergent evolution, controlling for phylogeny, selecting a model of trait evolution,  
or other). Where papers included multiple analyses using different numbers of  
25 species we used the median number of taxa. Where papers had multiple study

groups, statistics/R packages or reasons for fitting OU models we counted them in each relevant category. We summarise these results in Figures 1 and 2 and Table 1 in the main text, and the full dataset is available in Table S1 along with the full list of references.

## <sup>30</sup> **Literature review results**

In total, our literature search found 3720 papers published between 2005 and 2014, and the number has increased substantially since 2005 (Fig. 1 in main text). Most papers fit OU models to phylogenies with fewer than 100 taxa (mean =  $166.97 \pm 43.86$ , median = 58, Figure 2 in main text and Table S1). The majority of papers fit  
<sup>35</sup> OU models using R packages, particularly GEIGER and, although other uses are becoming more common, most papers use OU models in an effort to discern the “best” model of trait evolution or to control for phylogenetic non-independence (Table S1).

Table S1: Details of the papers used in our literature review. For each paper we recorded the study taxon, the number of tips in the phylogeny used to fit the Ornstein Uhlenbeck (OU) model, how the authors used the OU model in the paper, and the statistical package (usually R) used to carry out the analyses. For a full reference list see below. Journal abbreviations: Am Nat = The American Naturalist, ELE = Ecology Letters, JEB = Journal of Evolutionary Biology, PRSB = Proceedings of the Royal Society B: Biological Sciences, PNAS = Proceedings of the National Academy of the USA. Number of tips in the phylogeny the OU model was fitted to. Where there were multiple analyses in a paper we use the median number of tips. All packages mentioned are R packages apart from BayesTraits, COMPARE, MATLAB, Mesquite, PAM, PDAP and PDTREE.

|   | <b>Paper</b>                | <b>Year</b> | <b>Journal</b> | <b>Taxon</b>   | <b>Ntips</b> | <b>Use in paper</b>            | <b>Stats/R package</b> |
|---|-----------------------------|-------------|----------------|----------------|--------------|--------------------------------|------------------------|
| ω | Hansen and Orzack 2005      | 2005        | Evolution      | insects        | 15           | other                          | OUCH precursor?        |
|   | Edwards and Donoghue 2006   | 2006        | Am Nat         | plants         | 12           | ancestral state reconstruction | COMPARE                |
|   | Gvoždík and Damme 2006      | 2006        | Evolution      | amphibians     | 10           | phylogenetic correction        | COMPARE                |
|   | Halsey et al. 2006          | 2006        | Am Nat         | birds/mammals  | 90           | phylogenetic correction        | Custom code            |
|   | Ives and Godfray 2006       | 2006        | Am Nat         | insects        | 8            | phylogenetic signal            | MATLAB                 |
|   | Valiente-Banuet et al. 2006 | 2006        | PNAS           | plants         | 47           | model of evolution             | ? OUCH                 |
|   | Clabaut et al. 2007         | 2007        | Evolution      | fish           | 45           | phylogenetic correction        | APE                    |
|   | Gomez and Théry 2007        | 2007        | Am Nat         | birds          | 40           | model of evolution             | OUCH                   |
|   | Hipp 2007                   | 2007        | Evolution      | plants         | 53           | model of evolution             | BayesTraits            |
|   | Rezende et al. 2007         | 2007        | Nature         | plants/insects | ?            | phylogenetic signal            | ? OUCH                 |

|   |                            |      |           |            |     |                         |             |
|---|----------------------------|------|-----------|------------|-----|-------------------------|-------------|
|   | Spoor et al. 2007          | 2007 | PNAS      | mammals    | 210 | phylogenetic correction | PDAP        |
|   | StuartFox et al. 2007      | 2007 | Am Nat    | reptiles   | 21  | phylogenetic correction | COMPARE     |
|   | Buchwalter et al. 2008     | 2008 | PNAS      | insects    | 21  | phylogenetic correction | MATLAB      |
|   | Dumont and Payseur 2008    | 2008 | Evolution | mammals    | 13  | model of evolution      | OUCH        |
|   | Hansen et al. 2008         | 2008 | Evolution | mammals    | 105 | other                   | SLOUCH      |
|   | Smith et al. 2008          | 2008 | Evolution | plants     | 15  | phylogenetic correction | APE         |
|   | Warne and Charnov 2008     | 2008 | Am Nat    | reptiles   | 71  | phylogenetic correction | MATLAB      |
|   | Adams et al. 2009          | 2009 | PRSB      | amphibians | 10  | model of evolution      | OUCH        |
|   | Addison et al. 2009        | 2009 | PRSB      | birds      | 23  | phylogenetic correction | MATLAB      |
| ↳ | Agrawal et al. 2009        | 2009 | PNAS      | plants     | 53  | model of evolution      | GEIGER      |
|   | Bergmann et al. 2009       | 2009 | Evolution | reptiles   | 38  | model of evolution      | OUCH        |
|   | Collar et al. 2009         | 2009 | Evolution | fish       | 29  | model of evolution      | OUCH        |
|   | Gonzalez-Voyer et al. 2009 | 2009 | PRSB      | fish       | 39  | phylogenetic correction | APE/COMPARE |
|   | Goodman et al. 2009        | 2009 | Evolution | reptiles   | 20  | phylogenetic correction | COMPARE     |
|   | Huey et al. 2009           | 2009 | PRSB      | reptiles   | 70  | phylogenetic correction | MATLAB      |
|   | Kozak et al. 2009          | 2009 | Evolution | amphibians | 184 | model of evolution      | GEIGER      |
|   | Labra et al. 2009          | 2009 | Am Nat    | reptiles   | 83  | other                   | SLOUCH      |
|   | Rezende et al. 2009        | 2009 | ELE       | fish       | 116 | model of evolution      | PDTREE      |
|   | Swanson and Garland 2009   | 2009 | Evolution | birds      | 44  | phylogenetic correction | MATLAB      |

|   |                              |      |           |             |     |                                                       |                 |
|---|------------------------------|------|-----------|-------------|-----|-------------------------------------------------------|-----------------|
|   | Van Buskirk 2009             | 2009 | JEB       | amphibians  | 82  | other                                                 | SLOUCH          |
|   | Burbrink and Pyron 2010      | 2010 | Evolution | reptiles    | 29  | model of evolution                                    | GEIGER          |
|   | Cooper and Purvis 2010       | 2010 | Am Nat    | mammals     | 45  | model of evolution                                    | GEIGER          |
|   | Edwards and Smith 2010       | 2010 | PNAS      | plants      | 300 | model of evolution                                    | OUCH            |
|   | Harmon et al. 2010           | 2010 | Evolution | multiple    | 17  | model of evolution                                    | GEIGER          |
|   | Helmus et al. 2010           | 2010 | ELE       | zooplankton | 15  | phylogenetic correction                               | ?               |
|   | Kalinka et al. 2010          | 2010 | Nature    | insects     | 6   | model of evolution                                    | OUCH            |
|   | Kozak and Wiens 2010b        | 2010 | Am Nat    | amphibians  | 84  | model of evolution/<br>ancestral state reconstruction | GEIGER/<br>OUCH |
| 5 | Kozak and Wiens 2010a        | 2010 | ELE       | amphibians  | 11  | model of evolution                                    | OUCH            |
|   | Ord et al. 2010              | 2010 | Evolution | reptiles    | 16  | other                                                 | SLOUCH          |
|   | Price et al. 2010            | 2010 | Evolution | fish        | 122 | model of evolution                                    | GEIGER          |
|   | Slater et al. 2010           | 2010 | PRSB      | mammals     | 84  | model of evolution                                    | OUCH            |
|   | Angielczyk et al. 2011       | 2011 | Evolution | reptiles    | 8   | model of evolution                                    | OUCH            |
|   | Benesh et al. 2011           | 2011 | Evolution | helminths   | 310 | model of evolution                                    | OUCH            |
|   | Collar et al. 2011           | 2011 | Evolution | reptiles    | 37  | model of evolution                                    | Brownie         |
|   | Derryberry et al. 2011       | 2011 | Evolution | birds       | 285 | model of evolution                                    | GEIGER          |
|   | Galvan and Moller 2011       | 2011 | JEB       | birds       | 323 | phylogenetic correction                               | COMPARE         |
|   | Gonzalez-Voyer and Kolm 2011 | 2011 | JEB       | fish        | 49  | model of evolution                                    | GEIGER          |

|                            |      |           |            |     |                                                |                    |
|----------------------------|------|-----------|------------|-----|------------------------------------------------|--------------------|
| Ord et al. 2011            | 2011 | Evolution | multiple   | 23  | phylogenetic signal                            | SLOUCH             |
| Oufiero et al. 2011        | 2011 | Evolution | reptiles   | 106 | phylogenetic correction                        | SLOUCH             |
| Perez et al. 2011          | 2011 | JEB       | mammals    | 29  | phylogenetic correction                        | APE                |
| Raia and Meiri 2011        | 2011 | Evolution | mammals    | 842 | model of evolution                             | MOTMOT             |
| Rosas-Guerrero et al. 2011 | 2011 | Evolution | plants     | 20  | phylogenetic correction                        | APE                |
| Setiadi et al. 2011        | 2011 | Am Nat    | amphibians | 22  | model of evolution                             | OUCH               |
| Smith et al. 2011          | 2011 | Evolution | reptiles   | 15  | model of evolution                             | GEIGER             |
| Tulli et al. 2011          | 2011 | JEB       | reptiles   | 29  | phylogenetic correction                        | ?                  |
| Turbill et al. 2011        | 2011 | PRSB      | mammals    | 19  | phylogenetic correction                        | GEIGER             |
| Valido et al. 2011         | 2011 | JEB       | plants     | 111 | phylogenetic correction                        | APE                |
| Wiens et al. 2011          | 2011 | ELE       | amphibians | 337 | model of evolution/<br>phylogenetic correction | GEIGER/<br>COMPARE |
| Weir and Wheatcroft 2011   | 2011 | PRSB      | birds      | 232 | model of evolution                             | GEIGER             |
| Beaulieu et al. 2012       | 2012 | Evolution | plants     | 590 | model of evolution                             | OUwie              |
| Betancur-R et al. 2012     | 2012 | ELE       | fish       | 123 | model of evolution                             | GEIGER             |
| Blankers et al. 2012       | 2012 | JEB       | amphibians | 189 | phylogenetic correction                        | GEIGER             |
| Boettiger et al. 2012      | 2012 | Evolution | reptiles   | 23  | ancestral state reconstruction                 | OUCH               |
| Burbrink et al. 2012       | 2012 | PRSB      | multiple   | 41  | model of evolution                             | Custom code        |
| Calosi et al. 2012         | 2012 | JEB       | insects    | 25  | phylogenetic correction                        | MATLAB             |

|   |                          |      |           |            |     |                                |          |
|---|--------------------------|------|-----------|------------|-----|--------------------------------|----------|
|   | Claramunt et al. 2012a   | 2012 | Am Nat    | birds      | 290 | model of evolution             | GEIGER   |
|   | Claramunt et al. 2012b   | 2012 | PRSB      | birds      | 282 | model of evolution             | GEIGER   |
|   | Davis et al. 2012        | 2012 | JEB       | insects    | 53  | phylogenetic correction        | SLOUCH   |
|   | Diniz-Filho et al. 2012  | 2012 | Evolution | mammals    | 209 | other                          | PAM      |
|   | Fusco et al. 2012        | 2012 | Evolution | trilobites | 60  | model of evolution             | ?        |
|   | Gomez-Mestre et al. 2012 | 2012 | Evolution | amphibians | 720 | phylogenetic correction        | APE      |
|   | Ingram et al. 2012       | 2012 | JEB       | food webs  | 20  | model of evolution             | GEIGER   |
|   | Kellermann et al. 2012a  | 2012 | Evolution | insects    | 94  | phylogenetic correction        | SLOUCH   |
|   | Kellermann et al. 2012b  | 2012 | PNAS      | insects    | 94  | phylogenetic correction        | SLOUCH   |
| ↙ | Nogueira et al. 2012     | 2012 | JEB       | plants     | 105 | phylogenetic signal            | GEIGER   |
|   | Ord 2012                 | 2012 | JEB       | reptiles   | 32  | ancestral state reconstruction | SLOUCH   |
|   | Pearse and Hipp 2012     | 2012 | Evolution | plants     | 56  | phylogenetic correction        | SLOUCH   |
|   | Pellissier et al. 2012   | 2012 | JEB       | insects    | 83  | model of evolution             | ? APE    |
|   | Price et al. 2012        | 2012 | Evolution | fish       | 50  | model of evolution             | GEIGER   |
|   | Sallan and Friedman 2012 | 2012 | PRSB      | fish       | 100 | model of evolution             | GEIGER   |
|   | Santana et al. 2012      | 2012 | Evolution | mammals    | 85  | model of evolution             | OUCH     |
|   | Schmerler et al. 2012    | 2012 | PRSB      | plants     | 88  | phylogenetic correction        | nlme     |
|   | Smith 2012               | 2012 | Evolution | birds      | 42  | phylogenetic correction        | APE/nlme |
|   | Sookias et al. 2012      | 2012 | PRSB      | multiple   | 43  | model of evolution             | GEIGER   |

|   |                                 |      |           |                         |     |                                |                    |
|---|---------------------------------|------|-----------|-------------------------|-----|--------------------------------|--------------------|
|   | Stireman et al. 2012            | 2012 | JEB       | insects                 | 24  | model of evolution             | GEIGER             |
|   | Voje and Hansen 2012            | 2012 | Evolution | insects                 | 30  | phylogenetic correction        | SLOUCH             |
|   | Weir et al. 2012                | 2012 | Evolution | birds                   | 232 | model of evolution             | GEIGER             |
|   | Arbour and López-Fernández 2013 | 2013 | PRSB      | fish                    | 27  | model of evolution             | OUCH               |
|   | Benesh et al. 2013              | 2013 | Am Nat    | helminths               | 143 | phylogenetic correction        | APE                |
|   | Blackburn et al. 2013           | 2013 | Evolution | amphibians              | 18  | model of evolution             | GEIGER             |
|   | Christin et al. 2013            | 2013 | PNAS      | plants                  | 545 | model of evolution             | GEIGER/OUCH        |
|   | Frédérich et al. 2013           | 2013 | Am Nat    | fish                    | 208 | model of evolution             | OUwie              |
| ∞ | Friedman et al. 2013            | 2013 | Evolution | birds                   | 15  | model of evolution             | OUCH               |
|   | Guerrero et al. 2013            | 2013 | PNAS      | plants/reptiles         | 49  | ancestral state reconstruction | GEIGER/<br>COMPARE |
|   | Hertz et al. 2013               | 2013 | Evolution | reptiles                | 100 | model of evolution             | GEIGER             |
|   | Hossie et al. 2013              | 2013 | JEB       | amphibians/<br>reptiles | 104 | phylogenetic correction        | GEIGER             |
|   | Knope and Scales 2013           | 2013 | JEB       | fish                    | 26  | model of evolution             | OUCH               |
|   | Kostikova et al. 2013           | 2013 | Am Nat    | plants                  | 68  | model of evolution             | OUwie              |
|   | Lambert and Wiens 2013          | 2013 | Evolution | reptiles                | 117 | ancestral state reconstruction | GEIGER             |
|   | Lapiedra et al. 2013            | 2013 | PRSB      | birds                   | 154 | model of evolution             | OUwie              |



|                               |      |           |            |     |                                                            |                     |
|-------------------------------|------|-----------|------------|-----|------------------------------------------------------------|---------------------|
| Litsios et al. 2013           | 2013 | Evolution | plants     | 382 | model of evolution                                         | OUwie               |
| López-Fernández et al. 2013   | 2013 | Evolution | fish       | 135 | model of evolution                                         | GEIGER              |
| Machac et al. 2013            | 2013 | Evolution | mammals    | 231 | model of evolution                                         | GEIGER              |
| Mahler et al. 2013            | 2013 | Science   | reptiles   | 100 | convergent evolution                                       | SURFACE             |
| Maia et al. 2013              | 2013 | PNAS      | birds      | 47  | model of evolution                                         | OUwie               |
| Mirceta et al. 2013           | 2013 | Science   | mammals    | 130 | phylogenetic correction/<br>ancestral state reconstruction | Mesquite/<br>MATLAB |
| Moen et al. 2013              | 2013 | PRSB      | amphibians | 44  | convergent evolution                                       | GEIGER              |
| Pérez i de Lanuza et al. 2013 | 2013 | JEB       | reptiles   | 42  | ancestral state reconstruction                             | GEIGER              |
| Pienaar et al. 2013           | 2013 | ELE       | birds      | 382 | model of evolution                                         | SLOUCH              |
| Quintero and Wiens 2013       | 2013 | ELE       | multiple   | 500 | ancestral state reconstruction                             | GEIGER/COMPARE      |
| Ryan and Shaw 2013            | 2013 | PRSB      | mammals    | 34  | phylogenetic correction                                    | MATLAB              |
| Seddon et al. 2013            | 2013 | PRSB      | birds      | 153 | model of evolution                                         | ? GEIGER            |
| Tanabe and Sota 2013          | 2013 | Evolution | millipedes | 84  | phylogenetic correction                                    | APE                 |
| Voje et al. 2013              | 2013 | JEB       | fish       | 87  | other                                                      | SLOUCH              |
| Wiens et al. 2013             | 2013 | Evolution | reptiles   | 117 | ancestral state reconstruction                             | GEIGER              |

---

40 **Literature review references**

Adams, D. C., C. M. Berns, K. H. Kozak, and J. J. Wiens. 2009. Are rates of species diversification correlated with rates of morphological evolution? *Proceedings of the Royal Society B: Biological Sciences* 276:2729-2738.

Addison, B., K. C. Klasing, W. D. Robinson, S. H. Austin, and R. E. Ricklefs.  
45 2009. Ecological and life-history factors influencing the evolution of maternal antibody allocation: a phylogenetic comparison. *Proceedings of the Royal Society B: Biological Sciences* 276:3979-3987.

Agrawal, A. A., M. Fishbein, R. Halitschke, A. P. Hastings, D. L. Rabosky, and  
50 S. Rasmann. 2009. Evidence for adaptive radiation from a phylogenetic study of plant defenses. *Proceedings of the National Academy of Sciences* 106:18067-18072.

Angielczyk, K. D., C. R. Feldman, and G. R. Miller. 2011. Adaptive evolution of plastron shape in emydine turtles. *Evolution* 65:377-394.

Arbour, J. H., and H. López-Fernández. 2013. Ecological variation in South  
55 American geophagine cichlids arose during an early burst of adaptive morphological and functional evolution. *Proceedings of the Royal Society B: Biological Sciences* 280.

Beaulieu, J. M., D.-C. Jhwueng, C. Boettiger, and B. C. OMeara. 2012. Modeling stabilizing selection: expanding the Ornstein-Uhlenbeck model of adaptive  
evolution. *Evolution* 66:2369-2383.

60 Benesh, D. P., J. C. Chubb, and G. A. Parker. 2011. Exploitation of the same trophic link favors convergence of larval life-history strategies in complex life cycle helminths. *Evolution* 65:2286-2299.

Benesh, D. P., J. C. Chubb, and G. A. Parker. 2013. Complex life cycles: why  
refrain from growth before reproduction in the adult niche? *The American*  
65 *Naturalist* 181:39-51.

Bergmann, P. J., J. J. Meyers, and D. J. Irschick. 2009. Directional evolution of

stockiness coevolves with ecology and locomotion in lizards. *Evolution* 63:215-227.

Betancur-R, R., G. Ort, A. M. Stein, A. P. Marceniuk, and R. Alexander Pyron. 2012. Apparent signal of competition limiting diversification after ecological

70 transitions from marine to freshwater habitats. *Ecology Letters* 15:822-830.

Blackburn, D. C., C. D. Siler, A. C. Diesmos, J. A. McGuire, D. C. Cannatella, and R. M. Brown. 2013. An adaptive radiation of frogs in a Southeast Asian island archipelago. *Evolution* 67:2631-2646.

Blankers, T., D. C. Adams, and J. J. Wiens. 2012. Ecological radiation with  
75 limited morphological diversification in salamanders. *Journal of evolutionary biology* 25:634-646.

Boettiger, C., G. Coop, and P. Ralph. 2012. Is your phylogeny informative? Measuring the power of comparative methods. *Evolution* 66:2240-2251.

Buchwalter, D. B., D. J. Cain, C. A. Martin, L. Xie, S. N. Luoma, and T. Garland. 80 2008. Aquatic insect ecophysiological traits reveal phylogenetically based differences in dissolved cadmium susceptibility. *Proceedings of the National Academy of Sciences* 105:8321-8326.

Burbrink, F. T., X. Chen, E. A. Myers, M. C. Brandley, and R. A. Pyron. 2012. Evidence for determinism in species diversification and contingency in phenotypic  
85 evolution during adaptive radiation. *Proceedings of the Royal Society B: Biological Sciences* 279:4817-4826.

Burbrink, F. T., and R. A. Pyron. 2010. How does ecological opportunity influence rates of speciation, extinction, and morphological diversification in New World ratsnakes (tribe Lampropeltini)? *Evolution* 64:934-943.

90 Calosi, P., D. T. Bilton, J. I. Spicer, W. C. E. P. Verberk, A. Atfield, and T. Garland. 2012. The comparative biology of diving in two genera of European Dytiscidae (Coleoptera). *Journal of Evolutionary Biology* 25:329-341.

Christin, P.-A., C. P. Osborne, D. S. Chatelet, J. T. Columbus, G. Besnard, T. R. Hodkinson, L. M. Garrison, M. S. Vorontsova, and E. J. Edwards. 2013. Anatomical

95 enablers and the evolution of C<sub>4</sub> photosynthesis in grasses. *Proceedings of the National Academy of Sciences* 110:1381-1386.

Clabaut, C., P. M. E. Bunje, W. Salzburger, and A. Meyer. 2007. Geometric morphometric analyses provide evidence for the adaptive character of the Tanganyikan cichlid fish radiations. *Evolution* 61:560-578.

100 Claramunt, S., E. P. Derryberry, R. T. Brumfield, and J. V. Remsen Jr. 2012a. Ecological opportunity and diversification in a continental radiation of birds: climbing adaptations and cladogenesis in the Furnariidae. *The American Naturalist* 179:649-666.

Claramunt, S., E. P. Derryberry, J. V. Remsen, and R. T. Brumfield. 2012b. High 105 dispersal ability inhibits speciation in a continental radiation of passerine birds. *Proceedings of the Royal Society B: Biological Sciences* 279:1567-1574.

Collar, D. C., B. C. O'Meara, P. C. Wainwright, and T. J. Near. 2009. Piscivory limits diversification of feeding morphology in centrarchid fishes. *Evolution* 63:1557-1573.

110 Collar, D. C., J. A. Schulte II, and J. B. Losos. 2011. Evolution of extreme body size disparity in monitor lizards (*Varanus*). *Evolution* 65:2664-2680.

Cooper, N., and A. Purvis. 2010. Body size evolution in mammals: complexity in tempo and mode. *The American Naturalist* 175:727-738.

Davis, R. B., J. Javois, J. Pienaar, E. unap, and T. Tammaru. 2012. Disentangling 115 determinants of egg size in the Geometridae (Lepidoptera) using an advanced phylogenetic comparative method. *Journal of Evolutionary Biology* 25:210-219.

Derryberry, E. P., S. Claramunt, G. Derryberry, R. T. Chesser, J. Cracraft, A. Aleixo, J. Prez-Emn, J. J. V. Remsen, and R. T. Brumfield. 2011. Lineage 120 diversification and morphological evolution in a large-scale continental radiation: the Neotropical ovenbirds and woodcreepers (Aves: Furnariidae). *Evolution* 65:2973-2986.

Diniz-Filho, J. A. F., T. F. Rangel, T. Santos, and L. Mauricio Bini. 2012.

Exploring patterns of interspecific variation in quantitative traits using sequential phylogenetic eigenvector regressions. *Evolution* 66:1079-1090.

125 Dumont, B. L., and B. A. Payseur. 2008. Evolution of the genomic rate of recombination in mammals *Evolution* 62:276-294.

Edwards, E. J., and M. J. Donoghue. 2006. *Pereskia* and the origin of the cactus life-form. *American Naturalist* 167:777-793.

Edwards, E. J., and S. A. Smith. 2010. Phylogenetic analyses reveal the shady  
130 history of C<sub>4</sub> grasses. *Proceedings of the National Academy of Sciences* 107:2532-2537.

Frédérich, B., L. Sorenson, F. Santini, G. J. Slater, and M. E. Alfaro. 2013. Iterative ecological radiation and convergence during the evolutionary history of damselfishes (Pomacentridae). *The American Naturalist* 181:94-113.

135 Friedman, N. R., K. J. McGraw, and K. E. Omland. 2013. Evolution of carotenoid pigmentation in caciques and meadowlarks (Icteridae): repeated gains of red plumage coloration by carotenoid C<sub>4</sub>-oxygenation. *Evolution* in press.

Fusco, G., J. T. Garland, G. Hunt, and N. C. Hughes. 2012. Developmental trait evolution in trilobites. *Evolution* 66:314-329.

140 Galvan, I., and A. P. Moller. 2011. Brain size and the expression of pheomelanin-based colour in birds. *Journal of Evolutionary Biology* 24:999-1006.

Gomez, D., and M. Théry. 2007. Simultaneous crypsis and conspicuousness in color patterns: comparative analysis of a neotropical rainforest bird community. *The American Naturalist* 169:S42-S61.

145 Gomez-Mestre, I., R. A. Pyron, and J. J. Wiens. 2012. Phylogenetic analyses reveal unexpected patterns in the evolution of reproductive modes in frogs. *Evolution* 66:3687-3700.

Gonzalez-Voyer, A., and N. Kolm. 2011. Rates of phenotypic evolution of ecological characters and sexual traits during the Tanganyikan cichlid adaptive  
150 radiation. *Journal of Evolutionary Biology* 24:2378-2388.

Gonzalez-Voyer, A., S. Winberg, and N. Kolm. 2009. Social fishes and single mothers: brain evolution in African cichlids. *Proceedings of the Royal Society B: Biological Sciences* 276:161-167.

155 Goodman, B. A., S. C. Hudson, J. L. Isaac, and L. Schwarzkopf. 2009. The evolution of body shape in response to habitat: is reproductive output reduced in flat lizards? *Evolution* 63:1279-1291.

Guerrero, P. C., M. Rosas, M. T. K. Arroyo, and J. J. Wiens. 2013. Evolutionary lag times and recent origin of the biota of an ancient desert (AtacamaSechura). *Proceedings of the National Academy of Sciences* 110:11469-11474.

160 Gvoždík, L., and R. V. Damme. 2006. Triturus newts defy the running-swimming dilemma. *Evolution* 60:2110-2121.

Halsey, L. G., P. J. Butler, and T. M. Blackburn. 2006. A phylogenetic analysis of the allometry of diving. *The American Naturalist* 167:276-287.

165 Hansen, T. F., and S. H. Orzack. 2005. Assessing current adaptation and phylogenetic inertia as explanations of trait evolution: the need for controlled comparisons. *Evolution* 59:2063-2072.

Hansen, T. F., J. Pienaar, and S. H. Orzack. 2008. A comparative method for studying adaptation to a randomly evolving environment. *Evolution* 62:1965-1977.

170 Harmon, L. J., J. B. Losos, T. Jonathan Davies, R. G. Gillespie, J. L. Gittleman, W. Bryan Jennings, K. H. Kozak, M. A. McPeck, F. Moreno Roark, and T. J. Near. 2010. Early bursts of body size and shape evolution are rare in comparative data. *Evolution* 64:2385-2396.

Helmus, M. R., W. Keller, M. J. Paterson, N. D. Yan, C. H. Cannon, and J. A. Rusak. 2010. Communities contain closely related species during ecosystem  
175 disturbance. *Ecology Letters* 13:162-174.

Hertz, P. E., Y. Arima, A. Harrison, R. B. Huey, J. B. Losos, and R. E. Glor. 2013. Asynchronous evolution of physiology and morphology in *Anolis* lizards. *Evolution* 67:2101-2113.

Hipp, A. L. 2007. Nonuniform processes of chromosome evolution in sedges  
180 (Carex: Cyperaceae). *Evolution* 61:2175-2194.

Hossie, T. J., C. Hassall, W. Knee, and T. N. Sherratt. 2013. Species with a  
chemical defence, but not chemical offence, live longer. *Journal of Evolutionary  
Biology* 26:1598-1602.

Huey, R. B., C. A. Deutsch, J. J. Tewksbury, L. J. Vitt, P. E. Hertz, H. J. Álvarez  
185 Pérez, and T. Garland. 2009. Why tropical forest lizards are vulnerable to climate  
warming. *Proceedings of the Royal Society of London Series B-Biological Sciences*  
276:1939-1948.

Ingram, T., L. J. Harmon, and J. B. Shurin. 2012. When should we expect early  
bursts of trait evolution in comparative data? Predictions from an evolutionary food  
190 web model. *Journal of Evolutionary Biology* 25:1902-1910.

Ives, A. R., and H. C. J. Godfray. 2006. Phylogenetic analysis of trophic  
associations. *The American Naturalist* 168:E1-E14.

Kalinka, A. T., K. M. Varga, D. T. Gerrard, S. Preibisch, D. L. Corcoran, J.  
Jarrells, U. Ohler, C. M. Bergman, and P. Tomancak. 2010. Gene expression  
195 divergence recapitulates the developmental hourglass model. *Nature* 468:811-814.

Kellermann, V., V. Loeschcke, A. A. Hoffmann, T. N. Kristensen, C. Fljgaard, J.  
R. David, J.-C. Svenning, and J. Overgaard. 2012a. Phylogenetic constraints in key  
functional traits behind species' climate niches: patterns of desiccation and cold  
resistance across 95 *Drosophila* species. *Evolution* 66:3377-3389.

200 Kellermann, V., J. Overgaard, A. A. Hoffmann, C. Fljgaard, J.-C. Svenning, and  
V. Loeschcke. 2012b. Upper thermal limits of *Drosophila* are linked to species  
distributions and strongly constrained phylogenetically. *Proceedings of the National  
Academy of Sciences* 109:16228-16233.

Knope, M. L., and J. A. Scales. 2013. Adaptive morphological shifts to novel  
205 habitats in marine sculpin fishes. *Journal of Evolutionary Biology* 26:472-482.

Kostikova, A., G. Litsios, N. Salamin, and P. B. Pearman. 2013. Linking

life-history traits, ecology, and niche breadth evolution in North American eriogonoids (Polygonaceae). *The American Naturalist* 182:760-774.

210 Kozak, K. H., R. W. Mendyk, and J. J. Wiens. 2009. Can parallel diversification occur in sympatry? Repeated patterns of body-size evolution in coexisting clades of North American salamanders. *Evolution* 63:1769-1784.

Kozak, K. H., and J. J. Wiens. 2010a. Accelerated rates of climatic-niche evolution underlie rapid species diversification. *Ecology Letters* 13:1378-1389.

215 Kozak, K. H., and J. J. Wiens. 2010b. Niche conservatism drives elevational diversity patterns in Appalachian salamanders. *The American Naturalist* 176:40-54.

Labra, A., J. Pienaar, and T. F. Hansen. 2009. Evolution of thermal physiology in *Liolaemus* lizards: adaptation, phylogenetic inertia, and niche tracking. *The American Naturalist* 174:204-220.

220 Lambert, S. M., and J. J. Wiens. 2013. Evolution of viviparity: a phylogenetic test of the cold-climate hypothesis in phrynosomatid lizards. *Evolution* 67:2614-2630.

Lapiedra, O., D. Sol, S. Carranza, and J. M. Beaulieu. 2013. Behavioural changes and the adaptive diversification of pigeons and doves. *Proceedings of the Royal Society B: Biological Sciences* 280.

225 Litsios, G., R. O. West, A. Kostikova, F. Forest, C. Lexer, H. P. Linder, P. B. Pearman, N. E. Zimmermann, and N. Salamin. 2013. Effects of a fire response trait on diversification in replicated radiations. *Evolution in press*.

López-Fernández, H., J. H. Arbour, K. O. Winemiller, and R. L. Honeycutt. 2013. Testing for ancient adaptive radiations in Neotropical cichlid fishes. *Evolution* 67:1321-1337.

230 Machac, A., D. Storch, and J. J. Wiens. 2013. Ecological causes of decelerating diversification in carnivoran mammals. *Evolution* 67:2423-2433.

Mahler, D. L., T. Ingram, L. J. Revell, and J. B. Losos. 2013. Exceptional convergence on the macroevolutionary landscape in island lizard radiations. *Science* 341:292-295.



- 235 Maia, R., D. R. Rubenstein, and M. D. Shawkey. 2013. Key ornamental innovations facilitate diversification in an avian radiation. *Proceedings of the National Academy of Sciences* in press.
- Mirceta, S., A. V. Signore, J. M. Burns, A. R. Cossins, K. L. Campbell, and M. Berenbrink. 2013. Evolution of mammalian diving capacity traced by myoglobin net  
240 surface charge. *Science* 340:1234192.
- Moen, D. S., D. J. Irschick, and J. J. Wiens. 2013. Evolutionary conservatism and convergence both lead to striking similarity in ecology, morphology and performance across continents in frogs. *Proceedings of the Royal Society B: Biological Sciences* 280:20132156.
- 245 Nogueira, A., P. J. Rey, and L. G. Lohmann. 2012. Evolution of extrafloral nectaries: adaptive process and selective regime changes from forest to savanna. *Journal of Evolutionary Biology* 25:2325-2340.
- Ord, T. J. 2012. Historical contingency and behavioural divergence in territorial *Anolis* lizards. *Journal of Evolutionary Biology* 25:2047-2055.
- 250 Ord, T. J., L. King, and A. R. Young. 2011. Contrasting theory with the empirical data of species recognition. *Evolution* 65:2572-2591.
- Ord, T. J., J. A. Stamps, and J. B. Losos. 2010. Adaptation and plasticity of animal communication in fluctuating environments. *Evolution* 64:3134-3148.
- Oufiero, C. E., G. E. A. Gartner, S. C. Adolph, and T. Garland. 2011. Latitudinal  
255 and climatic variation in body size and dorsal scale counts in *Sceloporus* lizards: a phylogenetic perspective. *Evolution* 65:3590-3607.
- Pearse, I. S., and A. L. Hipp. 2012. Global patterns of leaf defenses in oak species. *Evolution* 66:2272-2286.
- Pellissier, L., S. Rasmann, G. Litsios, K. Fiedler, A. Dubuis, J. Pottier, and A.  
260 Guisan. 2012. High host-plant nitrogen content: a prerequisite for the evolution of antcaterpillar mutualism? *Journal of Evolutionary Biology* 25:1658-1666.
- Pérez i de Lanuza, G., E. Font, and J. L. Monterde. 2013. Using visual

modelling to study the evolution of lizard coloration: sexual selection drives the evolution of sexual dichromatism in lacertids. *Journal of Evolutionary Biology* 26:1826-1835.

Perez, S. I., J. Klaczko, G. Rocatti, and S. F. Dos Reis. 2011. Patterns of cranial shape diversification during the phylogenetic branching process of New World monkeys (Primates: Platyrrhini). *Journal of Evolutionary Biology* 24:1826-1835.

Pienaar, J., A. Ilany, E. Geffen, and Y. Yom-Tov. 2013. Macroevolution of lifehistory traits in passerine birds: adaptation and phylogenetic inertia. *Ecology Letters* 16:571-576.

Price, S. A., J. J. Tavera, T. J. Near, and P. Wainwright. 2012. Elevated rates of morphological and functional diversification in reef-dwelling haemulid fishes. *Evolution* 67:417-428.

Price, S. A., P. C. Wainwright, D. R. Bellwood, E. Kazancioglu, D. C. Collar, and T. J. Near. 2010. Functional innovations and morphological diversification in parrotfish. *Evolution* 64:3057-3068.

Quintero, I., and J. J. Wiens. 2013. Rates of projected climate change dramatically exceed past rates of climatic niche evolution among vertebrate species. *Ecology letters* 16:1095-1103.

Raia, P., and S. Meiri. 2011. The tempo and mode of evolution: body sizes of island mammals. *Evolution* 65:1927-1934.

Rezende, E. L., E. M. Albert, M. A. Fortuna, and J. Bascompte. 2009. Compartments in a marine food web associated with phylogeny, body mass, and habitat structure. *Ecology Letters* 12:779-788.

Rezende, E. L., J. E. Lavabre, P. R. Guimares, P. Jordano, and J. Bascompte. 2007. Non-random coextinctions in phylogenetically structured mutualistic networks. *Nature* 448:925-928.

Rosas-Guerrero, V., M. Quesada, W. S. Armbruster, R. Prez-Barrales, and S. D. Smith. 2011. Influence of pollination specialization and breeding system on floral

integration and phenotypic variation in *Ipomoea*. *Evolution* 65:350-364.

Ryan, T. M., and C. N. Shaw. 2013. Trabecular bone microstructure scales allometrically in the primate humerus and femur. *Proceedings of the Royal Society B: Biological Sciences* 280.

295 Sallan, L. C., and M. Friedman. 2012. Heads or tails: staged diversification in vertebrate evolutionary radiations. *Proceedings of the Royal Society B: Biological Sciences* 279:2025-2032.

Santana, S. E., I. R. Grosse, and E. R. Dumont. 2012. Dietary hardness, loading behavior, and the evolution of skull form in bats. *Evolution* 66:2587-2598.

300 Schmerler, S. B., W. L. Clement, J. M. Beaulieu, D. S. Chatelet, L. Sack, M. J. Donoghue, and E. J. Edwards. 2012. Evolution of leaf form correlates with tropicaltemperate transitions in *Viburnum* (Adoxaceae). *Proceedings of the Royal Society B: Biological Sciences* 279:3905-3913.

Seddon, N., C. A. Botero, J. A. Tobias, P. O. Dunn, H. E. A. MacGregor, D. R. Rubenstein, J. A. C. Uy, J. T. Weir, L. A. Whittingham, and R. J. Safran. 2013. Sexual selection accelerates signal evolution during speciation in birds. *Proceedings of the Royal Society B: Biological Sciences* 280.

Setiadi, M. I., J. A. McGuire, R. M. Brown, M. Zubairi, D. T. Iskandar, N. Andayani, J. Supriatna, and B. J. Evans. 2011. Adaptive radiation and ecological opportunity in Sulawesi and Philippine fanged frog (*Limnonectes*) communities. *The American Naturalist* 178:221-240.

Slater, G. J., S. A. Price, F. Santini, and M. E. Alfaro. 2010. Diversity versus disparity and the radiation of modern cetaceans. *Proceedings of the Royal Society B: Biological Sciences* 277:3097-3104.

315 Smith, K. L., L. J. Harmon, L. P. Shoo, and J. Melville. 2011. Evidence of constrained phenotypic evolution in a cryptic species complex of agamid lizards. *Evolution* 65:976-992.

Smith, N. D. 2012. Body mass and foraging ecology predict evolutionary

- patterns of skeletal pneumaticity in the diverse "waterbird" clade. *Evolution*  
320 66:1059-1078.
- Smith, S. D., C. Ané, and D. A. Baum. 2008. The role of pollinator shifts in the  
floral diversification of *Iochroma* (Solanaceae). *Evolution* 62:793-806.
- Sookias, R. B., R. J. Butler, and R. B. J. Benson. 2012. Rise of dinosaurs reveals  
major body-size transitions are driven by passive processes of trait evolution.  
325 *Proceedings of the Royal Society B: Biological Sciences* 279:2180-2187.
- Spoor, F., T. Garland, G. Krovitz, T. M. Ryan, M. T. Silcox, and A. Walker. 2007.  
The primate semicircular canal system and locomotion. *Proceedings of the National  
Academy of Sciences* 104:10808-10812.
- Stireman, J. O., H. Devlin, and P. Abbot. 2012. Rampant host- and defensive  
330 phenotype-associated diversification in a goldenrod gall midge. *Journal of  
Evolutionary Biology* 25:1991-2004.
- StuartFox, D., A. Moussalli, and M. J. Whiting. 2007. Natural selection on  
social signals: signal efficacy and the evolution of chameleon display coloration. *The  
American Naturalist* 170:916-930.
- 335 Swanson, D. L., and J. T. Garland. 2009. The evolution of high summit  
metabolism and cold tolerance in birds and its impact on present-day distributions.  
*Evolution* 63:184-194.
- Tanabe, T., and T. Sota. 2013. Both male and female novel traits promote the  
correlated evolution of genitalia between the sexes in an arthropod. *Evolution in*  
340 *press*.
- Tulli, M. J., V. Abdala, and F. B. Cruz. 2011. Relationships among morphology,  
clinging performance and habitat use in Liolaemini lizards. *Journal of Evolutionary  
Biology* 24:843-855.
- Turbill, C., C. Bieber, and T. Ruf. 2011. Hibernation is associated with increased  
345 survival and the evolution of slow life histories among mammals. *Proceedings of  
the Royal Society B: Biological Sciences* 278:3355-3363.

Valido, A., H. M. Schaefer, and P. Jordano. 2011. Colour, design and reward: phenotypic integration of fleshy fruit displays. *Journal of Evolutionary Biology* 24:751-760.

350 Valiente-Banuet, A., A. V. Rumebe, M. Verd, and R. M. Callaway. 2006. Modern Quaternary plant lineages promote diversity through facilitation of ancient Tertiary lineages. *Proceedings of the National Academy of Sciences* 103:16812-16817.

Van Buskirk, J. 2009. Getting in shape: adaptation and phylogenetic inertia in morphology of Australian anuran larvae. *Journal of evolutionary biology* 355 22:1326-1337.

Voje, K. L., and T. F. Hansen. 2012. Evolution of static allometries: adaptive change in allometric slopes of eye span in stalk-eyed flies. *Evolution* 67:453-467.

Voje, K. L., A. B. Mazzearella, T. F. Hansen, K. Østbye, T. Klepaker, A. Bass, A. Herland, K. M. Brum, F. Gregersen, and L. A. Vøllestad. 2013. Adaptation and 360 constraint in a stickleback radiation. *Journal of evolutionary biology* 26:2396-2414.

Warne, R. W., and E. L. Charnov. 2008. Reproductive allometry and the sizenumber tradeoff for lizards. *The American Naturalist* 172:E80-E98.

Weir, J. T., and D. Wheatcroft. 2011. A latitudinal gradient in rates of evolution of avian syllable diversity and song length. *Proceedings of the Royal Society B: Biological Sciences* 365 278:1713-1720.

Weir, J. T., D. J. Wheatcroft, and T. D. Price. 2012. The role of ecological constraint in driving the evolution of avian song frequency across a latitudinal gradient. *Evolution* 66:2773-2783.

Wiens, J. J., K. H. Kozak, and N. Silva. 2013. Diversity and niche evolution 370 along aridity gradients in North American lizards (Phrynosomatidae). *Evolution* 67:1715-1728.

Wiens, J. J., R. A. Pyron, and D. S. Moen. 2011. Phylogenetic origins of local-scale diversity patterns and the causes of Amazonian megadiversity. *Ecology Letters* 14:643-652.
